# Supplementary material for: Enhanced sulfate formation in mixed biomass burning and sea-salt interactions mediated by photosensitization: effects of chloride, nitrogen-containing compounds, and atmospheric aging
Source: Copernicus journal article supplement (doi:10.5194/acp-25-425-2025), 2025-01-13
Supplement: Supplementary file 1 [file acp-25-425-2025-supplement.pdf]

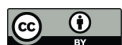

*Supplement of*

**Enhanced sulfate formation in mixed biomass burning and sea-salt interactions mediated by photosensitization: effects of chloride, nitrogen-containing compounds, and atmospheric aging**

**Rongzhi Tang et al.**

*Correspondence to:* Chak K. Chan ([chak.chan@kaust.edu.sa](mailto:chak.chan@kaust.edu.sa))

The copyright of individual parts of the supplement might differ from the article licence.

## S1. Chemical analysis

The sulfate, nitrate and chloride anions in the BB extracts were analyzed by a Dionex ion chromatography (IC, Dionex ICS-1100, Sunnyvale, CA) with a Dionex AS-DV autosampler (Sunnyvale, CA). The key analytical system includes a suppressed conductivity detector (Sunnyvale, CA), a self-regenerating anion suppressor (ASRS 300) and an AS 11 analytical column.

The particulate organic matter collected on BB filters were analyzed by a comprehensive two-dimensional gas chromatography-mass spectrometry (GC×GC-MS, GC-MS TQ 8050, SHIMADZU, Japan) coupled with a thermal desorption module (TDS 3, C506, Gerstel). The first column of GC×GC was non-polar SH-Rxi-1ms (30 m × 0.25 mm × 0.25 μm) and second column was mid-polar BPX50 (2.5 m × 0.1 mm × 0.1 μm). The modulation period was 6 s. The desorption temperature of TDS was 280 °C. More details can be found in previous research (Song et al., 2022b; Song et al., 2022a). Water-soluble organics of the BB extracts were analyzed by an ultra-high performance liquid chromatography (Thermo Scientific Dionex UltiMate 3000 UHPLC, USA) coupled with high-resolution Orbitrap Fusion Lumos Tribrid mass spectrometry (UHPLC-Orbitrap-HR-MS, Thermo Fisher Scientific, USA). Chromatographic separation was conducted using a reversed-phase column (Acquity HSS T3 column, 100×2.1 mm, 1.8 μm particle size, Waters Corp., Ireland) at 40°C, and the autosampler was cooled at 4 °C. Mobile phases included eluent A (water with 0.1% formic acid) and eluent B (acetonitrile with 0.1% formic acid). The gradient elution program consisted of a 10% B start for 1 min, increasing to 90% B over 25 min, holding for 4 min, decreasing to 10% B in 1 min, and a 5 min re-equilibration. The flow rate was 0.2 mL/min, injection volume was 10 μL. NTA software (Compound Discoverer CD, version 3.2, Thermo Fisher Scientific) was employed to identify the chromatographic peak features. Compound identification was based on the combination of features eluting at the same retention time and exhibiting m/z values corresponding to precise mass differences, including isotopes, adducts, clusters, or fragments. In all the experiments, threshold intensities of 1E5 (low) and 1E10 (high) were applied to the two-dimensional coordinate system (RT: 1-20 min, m/z: 50-500). The CD software automatically excluded ions with peak abundances below or above the threshold.

The identified molecular formula, mainly CcHhOoNnSs, were classified into different categories, namely, CHO, CHON, CHONS, CHOS and others. For example, CHON represents compounds composed solely of carbon, hydrogen, oxygen and nitrogen elements. The "others" category includes compounds not falling into CHO, CHON, CHONS, or CHOS, as well as signals without calculated elemental formulas. Molecular formulas were also categorized according to their elemental ratios, e.g. H/C, O/C, N/C, double bond equivalents (DBE), modified aromaticity index ( $AI_{mod}$ ) and maximum carbonyl ratio (MCR). The DBE,  $AI_{mod}$  and MCR (Zhang et al., 2021) were calculated as:

$$DBE=1+c-0.5h+0.5n \quad (S1)$$

$$AI_{mod}=\frac{DBE_{AI}}{C_{AI}}=\frac{1+c-0.5o-s-0.5(n+h)}{c-0.5o-n-s} \quad (S2)$$

$$MCR=\frac{DBE}{o} \quad (S3)$$

In which c, h, o and n corresponds to the number of C, H, O and N atoms, respectively in the assigned molecular formula. Formula were categorized into six groups, i.e., condensed aromatics ( $AI_{mod}\geq 0.67$ ), polyphenolics ( $0.50 < AI_{mod} < 0.67$ ), highly unsaturated and phenolic formula ( $AI_{mod}\leq 0.5$ ,  $H/C < 1.5$ ), aliphatics ( $H/C\geq 1.5$ ,  $O/C\leq 0.9$ ,  $N=0$ ), peptide-like formula ( $H/C\geq 1.5$ ,

O/C≤0.9, N=0) and sugar-like formula (H/C≥1.5, O/C > 0.9) (Zherebker et al., 2022; Koch and Dittmar, 2006). For MCR, here we only applied it in CcHhOo compounds. The Equation S3 fits for compounds with larger or equal atom O compared to DBE. If the atom O in CcHhOo is smaller than DBE, then MCR is considered to be 1, i.e., all the O atoms contribute to DBE.

## S2. Possible pathways involved in the SO<sub>2</sub>/HSO<sub>3</sub><sup>-</sup> oxidation

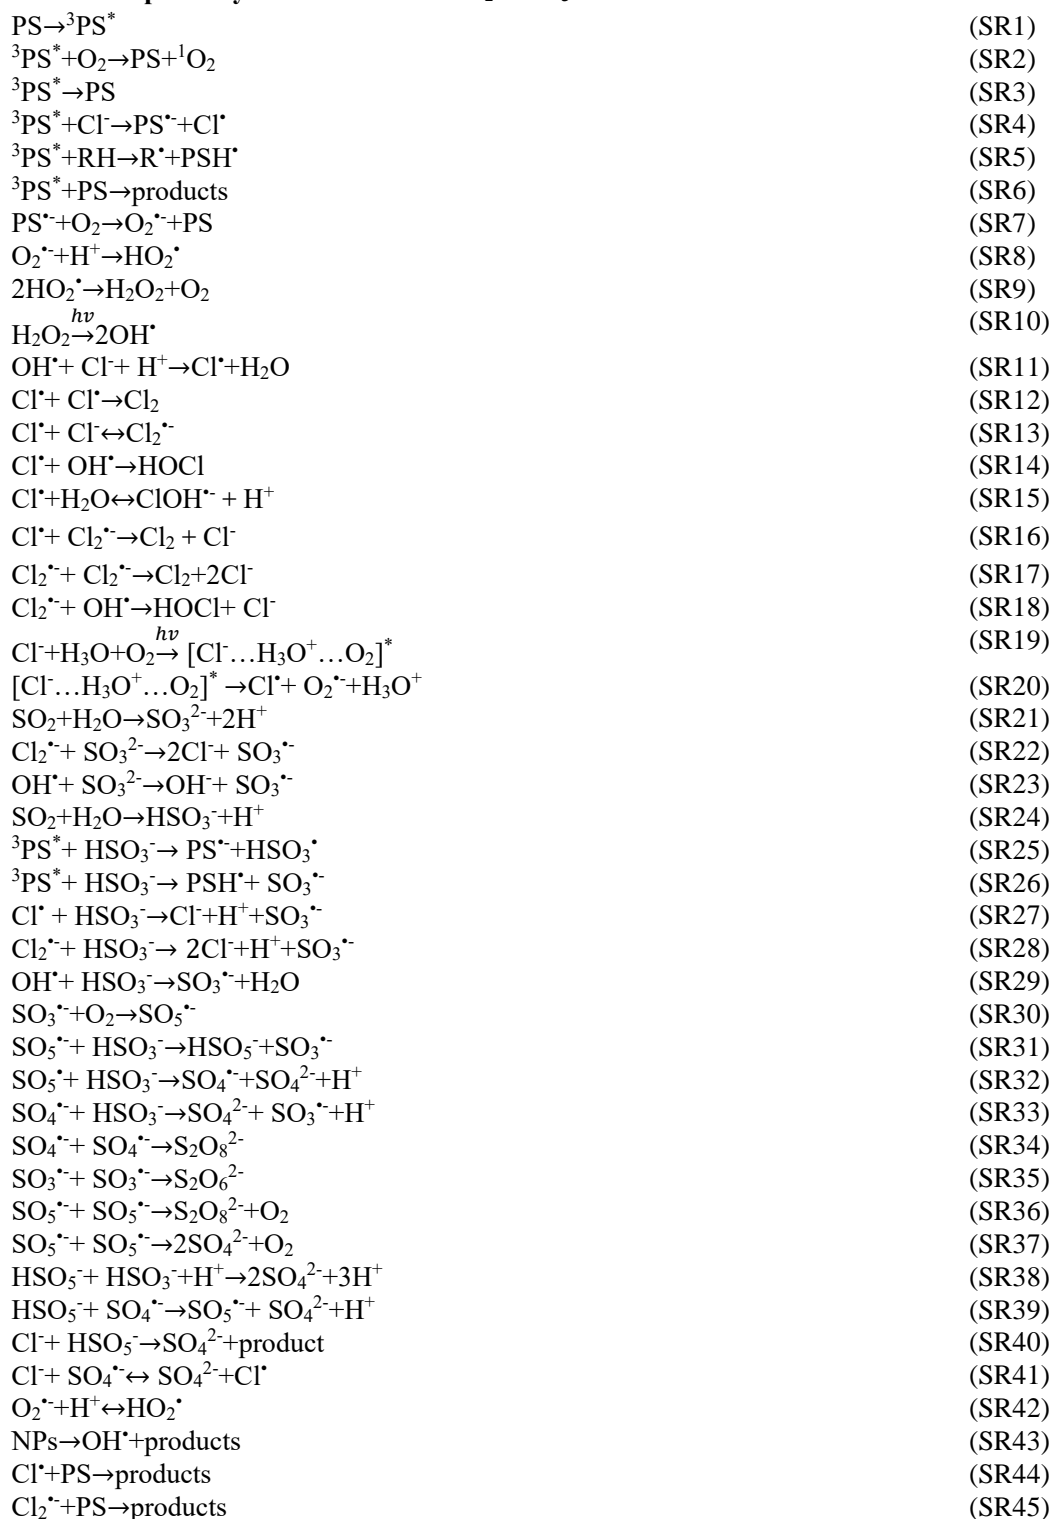

**Table S1.** Chemical compositions in extracted BB and IS extracts.

| Category        | TOC<br>(mg L <sup>-1</sup> ) | Cr<br>(µg L <sup>-1</sup> ) | Cu<br>(µg L <sup>-1</sup> ) | Fe<br>(µg L <sup>-1</sup> ) | Mn<br>(µg L <sup>-1</sup> ) | Ni<br>(µg L <sup>-1</sup> ) | Ti<br>(µg L <sup>-1</sup> ) | Zn<br>(µg L <sup>-1</sup> ) | Cl <sup>-</sup><br>(mg L <sup>-1</sup> ) | SO <sub>4</sub> <sup>2-</sup><br>(mg L <sup>-1</sup> ) | NO <sub>3</sub> <sup>-</sup><br>(mg L <sup>-1</sup> ) | ∑ <i>anions</i> <sup>a</sup><br>(mg L <sup>-1</sup> ) | ∑ <i>anions</i><br>/TOC |
|-----------------|------------------------------|-----------------------------|-----------------------------|-----------------------------|-----------------------------|-----------------------------|-----------------------------|-----------------------------|------------------------------------------|--------------------------------------------------------|-------------------------------------------------------|-------------------------------------------------------|-------------------------|
| RS <sub>F</sub> | 69.9                         | 1.8                         | 0                           | 31.7                        | 5.8                         | 0                           | 73.0                        | 74.5                        | 44.1                                     | 6.0                                                    | 3.2                                                   | 53.3                                                  | 0.8                     |
| WS <sub>F</sub> | 64.5                         | 2.3                         | 4.6                         | 96.9                        | 2.9                         | 1.2                         | 94.2                        | 30.3                        | 41.1                                     | 5.2                                                    | 3.1                                                   | 49.4                                                  | 0.8                     |
| CS <sub>F</sub> | 45.6                         | 0.9                         | 0                           | 31.9                        | 3.5                         | 0                           | 76.9                        | 29.1                        | 9.5                                      | 4.5                                                    | 3.2                                                   | 17.2                                                  | 0.4                     |
| IS <sub>F</sub> | 571.1                        | 1.7                         | 23.2                        | 12.5                        | 7.6                         | 0.7                         | 9.1                         | 77.3                        | 8.1                                      | 3.7                                                    | 5.6                                                   | 17.5                                                  | 0.03                    |
| RS <sub>A</sub> | 61.4                         | 2.6                         | 39.5                        | 87.5                        | 5.2                         | 0.5                         | 76.3                        | 59.5                        | 35.5                                     | 5.2                                                    | 3.1                                                   | 43.7                                                  | 0.7                     |
| WS <sub>A</sub> | 52.7                         | 4.8                         | 31.6                        | 176.7                       | 3.3                         | 1.6                         | 43.7                        | 26.0                        | 39.9                                     | 4.9                                                    | 3.1                                                   | 47.9                                                  | 0.9                     |
| CS <sub>A</sub> | 34.0                         | 2.7                         | 21.8                        | 111.8                       | 3.4                         | 0.5                         | 21.3                        | 26.0                        | 16.9                                     | 4.0                                                    | 3.1                                                   | 24.0                                                  | 0.7                     |
| IS <sub>A</sub> | 584.8                        | 4.2                         | 33.7                        | 87.9                        | 10.1                        | 0.8                         | 17.0                        | 100.1                       | 8.4                                      | 4.3                                                    | 5.6                                                   | 18.4                                                  | 0.03                    |

$$\sum \text{anions} = [\text{Cl}^-] + [\text{SO}_4^{2-}] + [\text{NO}_3^-]$$

**Table S2.** Possible photosensitizers, formulas and structures in BB extracts detected by state-of-art mass spectrometer.

| Category | Possible photosensitizers | Formula                         | Calc. MW | Possible structure                                                                    | Detected by |
|----------|---------------------------|---------------------------------|----------|---------------------------------------------------------------------------------------|-------------|
| PAHs     | Fluoranthene              | C <sub>16</sub> H <sub>10</sub> | 202.256  | 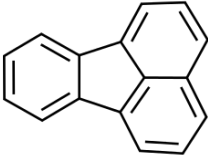   | GC×GC-MS    |
|          | Pyrene                    | C <sub>16</sub> H <sub>10</sub> | 202.256  |    | GC×GC-MS    |
|          | 1-methylpyrene            | C <sub>17</sub> H <sub>12</sub> | 216.277  |   | GC×GC-MS    |
|          | 4-methylphenanthrene      | C <sub>15</sub> H <sub>12</sub> | 192.256  |  | GC×GC-MS    |

---

3,6-  
dimethylphenanthrene

C<sub>16</sub>H<sub>14</sub>

206.282

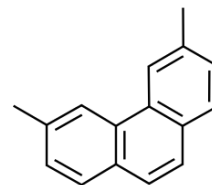

GC×GC-MS

---

2-phenylnaphthalene

C<sub>16</sub>H<sub>12</sub>

204.266

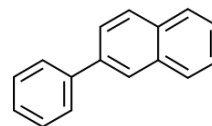

GC×GC-MS

---

Retene

C<sub>18</sub>H<sub>18</sub>

234.335

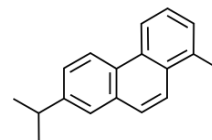

GC×GC-MS

---

4,5-dihdropyrene

C<sub>16</sub>H<sub>12</sub>

204.266

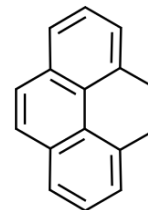

GC×GC-MS

---

|                             |                                  |         |                                                                                      |          |
|-----------------------------|----------------------------------|---------|--------------------------------------------------------------------------------------|----------|
| 2-methylpyrene              | C <sub>17</sub> H <sub>12</sub>  | 216.277 | 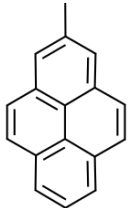  | GC×GC-MS |
| 2-methylanthracene          | C <sub>15</sub> H <sub>12</sub>  | 192.256 |   | GC×GC-MS |
| 1H-Phenalen-1-one           | C <sub>13</sub> H <sub>8</sub> O | 180.202 |   | GC×GC-MS |
| 2,3,5-trimethylphenanthrene | C <sub>17</sub> H <sub>16</sub>  | 220.309 |  | GC×GC-MS |

---

|                      |                                 |         |                                                                                      |          |
|----------------------|---------------------------------|---------|--------------------------------------------------------------------------------------|----------|
| Chrysene             | C <sub>18</sub> H <sub>12</sub> | 228.288 | 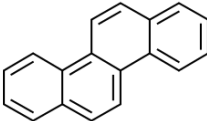  | GC×GC-MS |
| Cyclopenta[cd]pyrene | C <sub>18</sub> H <sub>10</sub> | 226.272 |   | GC×GC-MS |
| Triphenylene         | C <sub>18</sub> H <sub>12</sub> | 228.288 |   | GC×GC-MS |
| Benzo[b]fluoranthene | C <sub>20</sub> H <sub>12</sub> | 252.309 |  | GC×GC-MS |

---



---

|                        |                                 |         |                                                                                      |                                             |
|------------------------|---------------------------------|---------|--------------------------------------------------------------------------------------|---------------------------------------------|
| Perylene               | C <sub>20</sub> H <sub>12</sub> | 252.309 | 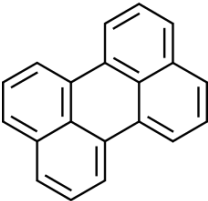  | GC×GC-MS                                    |
| Benzo[a]pyrene         | C <sub>20</sub> H <sub>12</sub> | 252.309 |   | GC×GC-MS                                    |
| Indeno[1,2,3-cd]pyrene | C <sub>22</sub> H <sub>12</sub> | 276.331 |   | GC×GC-MS                                    |
| Acetophenone           | C <sub>8</sub> H <sub>8</sub> O | 120.151 |  | GC×GC-MS<br>UHPLC-<br>Orbitrap-MS<br>(ESI+) |

---

|                           |                                                |         |                                                                                      |                                   |
|---------------------------|------------------------------------------------|---------|--------------------------------------------------------------------------------------|-----------------------------------|
| Acetosyringone            | C <sub>10</sub> H <sub>12</sub> O <sub>4</sub> | 196.202 | 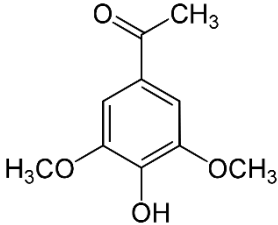  | GC×GC-MS<br>Orbitrap-MS<br>(ESI-) |
| Vanillin                  | C <sub>8</sub> H <sub>8</sub> O <sub>3</sub>   | 152.149 |   | GC×GC-MS<br>Orbitrap-MS<br>(ESI-) |
| 3,4-dimethoxybenzaldehyde | C <sub>9</sub> H <sub>10</sub> O <sub>3</sub>  | 166.176 |   | GC×GC-MS<br>Orbitrap-MS<br>(ESI-) |
| Syringaldehyde            | C <sub>9</sub> H <sub>10</sub> O <sub>4</sub>  | 182.17  |  | GC×GC-MS<br>Orbitrap-MS<br>(ESI-) |

---

Furfural

C<sub>5</sub>H<sub>4</sub>O<sub>2</sub>

96.08

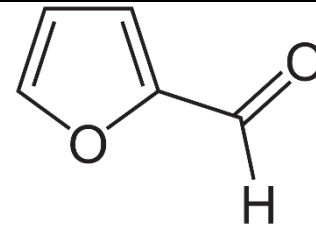

Orbitrap-MS  
(ESI-)

---

**Table S3.** Possible acids and formula in BB extracts by ESI- mode. Note that the acids listed appeared at least in six BB extracts.

| Possible acids                             | Formula                                        | Calc. MW |
|--------------------------------------------|------------------------------------------------|----------|
| Citraconic acid                            | C <sub>5</sub> H <sub>6</sub> O <sub>4</sub>   | 130.0265 |
| Homovanillic acid                          | C <sub>9</sub> H <sub>10</sub> O <sub>4</sub>  | 182.0579 |
| Vanillic acid                              | C <sub>8</sub> H <sub>8</sub> O <sub>4</sub>   | 168.0423 |
| Succinic acid                              | C <sub>4</sub> H <sub>6</sub> O <sub>4</sub>   | 118.0265 |
| 3-Methylsalicylic acid                     | C <sub>8</sub> H <sub>8</sub> O <sub>3</sub>   | 152.0473 |
| 2-Methylbenzoic acid                       | C <sub>8</sub> H <sub>8</sub> O <sub>2</sub>   | 136.0524 |
| 3,5-Dihydroxybenzoic acid                  | C <sub>7</sub> H <sub>6</sub> O <sub>4</sub>   | 154.0266 |
| Salicylic acid                             | C <sub>7</sub> H <sub>6</sub> O <sub>3</sub>   | 138.0317 |
| Azelaic acid                               | C <sub>9</sub> H <sub>16</sub> O <sub>4</sub>  | 188.1049 |
| Glutaric acid                              | C <sub>5</sub> H <sub>8</sub> O <sub>4</sub>   | 132.0422 |
| Sorbic acid                                | C <sub>6</sub> H <sub>8</sub> O <sub>2</sub>   | 112.0523 |
| Methylsuccinic acid                        | C <sub>5</sub> H <sub>8</sub> O <sub>4</sub>   | 132.0422 |
| 3-Allyl-2-hydroxybenzoic acid              | C <sub>10</sub> H <sub>10</sub> O <sub>3</sub> | 178.063  |
| trans-Cinnamic acid                        | C <sub>9</sub> H <sub>8</sub> O <sub>2</sub>   | 148.0524 |
| Ferulic acid                               | C <sub>10</sub> H <sub>10</sub> O <sub>4</sub> | 194.0579 |
| Homogentisic acid                          | C <sub>8</sub> H <sub>8</sub> O <sub>4</sub>   | 168.0423 |
| 2-Hydroxycinnamic acid                     | C <sub>9</sub> H <sub>8</sub> O <sub>3</sub>   | 164.0474 |
| 2,3-Dihydro-1-benzofuran-2-carboxylic acid | C <sub>9</sub> H <sub>8</sub> O <sub>3</sub>   | 164.0473 |
| DL-Mandelic acid                           | C <sub>8</sub> H <sub>8</sub> O <sub>3</sub>   | 152.0473 |

---

|                             |          |          |
|-----------------------------|----------|----------|
| 6-Methoxysalicylic acid     | C8H8O4   | 168.0423 |
| Isophthalic acid            | C8H6O4   | 166.0266 |
| Phenylglyoxylic acid        | C8H6O3   | 150.0317 |
| 4-Hydroxyphenylpyruvic acid | C9H8O4   | 180.0423 |
| Syringic acid               | C9H10O5  | 198.0529 |
| 2-Methylglutaric acid       | C6H10O4  | 146.0579 |
| BMK glycidic acid           | C10H10O3 | 178.063  |
| Caffeic acid                | C9H8O4   | 180.0423 |
| 2-Anisic acid               | C8H8O3   | 152.0473 |
| 6-Hydroxypicolinic acid     | C6 H5NO3 | 139.0269 |
| 4-Hydroxymandelic acid      | C8H8O4   | 168.0423 |
| Homovanillic acid           | C9H10O4  | 182.0579 |
| 6-Hydroxy-2-naphthoic acid  | C11H8O3  | 188.0474 |
| 3-Methoxyphenylacetic acid  | C9H10O3  | 166.063  |
| Sinapinic acid              | C11H12O5 | 224.0685 |

---

**Table S4.** Shapiro-Wilk normality test results for the analysis of correlation coefficients.

| Parameter        | Statistic | p-value  | Decision at level (5%) |
|------------------|-----------|----------|------------------------|
| k <sub>SO4</sub> | 0.90341   | 0.17551  | Can't reject normality |
| Chloride         | 0.66506   | 3.96E-04 | Reject normality       |
| Fe               | 0.83678   | 0.02531  | Reject normality       |
| Mn               | 0.79415   | 0.00804  | Reject normality       |
| Sulfate          | 0.70692   | 9.83E-04 | Reject normality       |
| Nitrate          | 0.87657   | 0.07923  | Can't reject normality |
| CHO-             | 0.80111   | 0.00964  | Reject normality       |
| CHON-            | 0.78144   | 0.00581  | Reject normality       |
| Others-          | 0.78595   | 0.00651  | Reject normality       |
| CHO+             | 0.68063   | 5.52E-04 | Reject normality       |
| CHON+            | 0.7749    | 0.00492  | Reject normality       |
| CHN+             | 0.86772   | 0.06114  | Can't reject normality |
| Others+          | 0.88449   | 0.10007  | Can't reject normality |

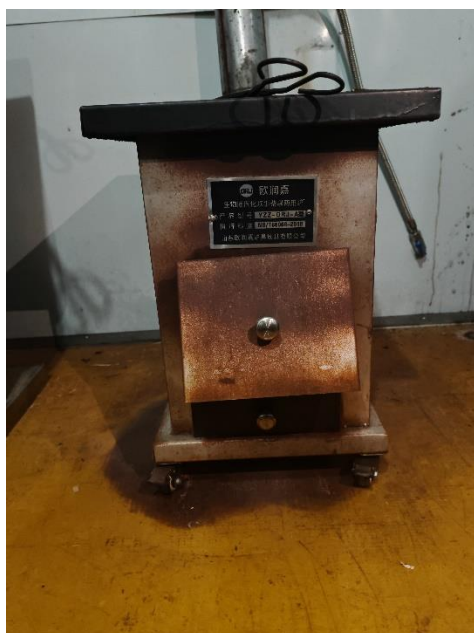

Figure S1. Image of the iron stove used in this study.

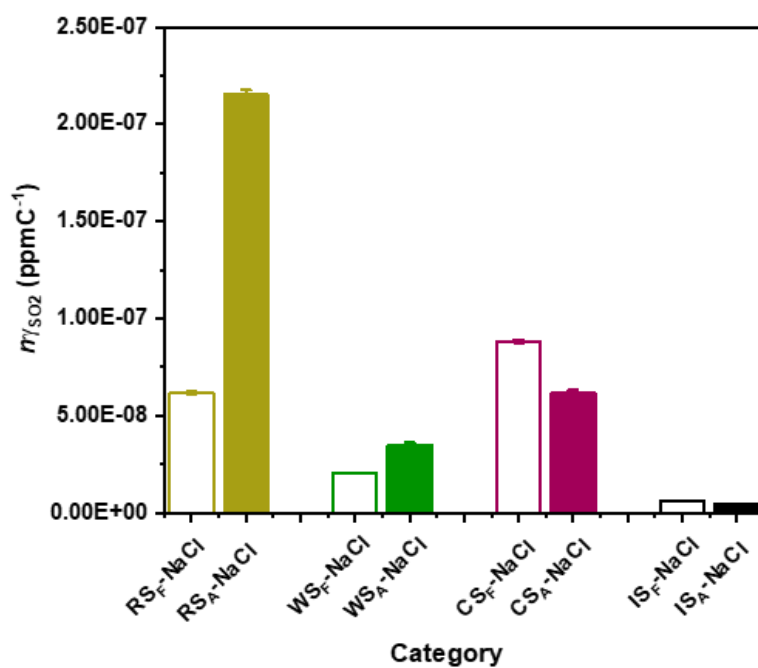

Figure S2. Differences of normalized SO<sub>2</sub> uptake coefficients  $n\gamma_{SO_2}$  between fresh and aged BB-NaCl droplets.

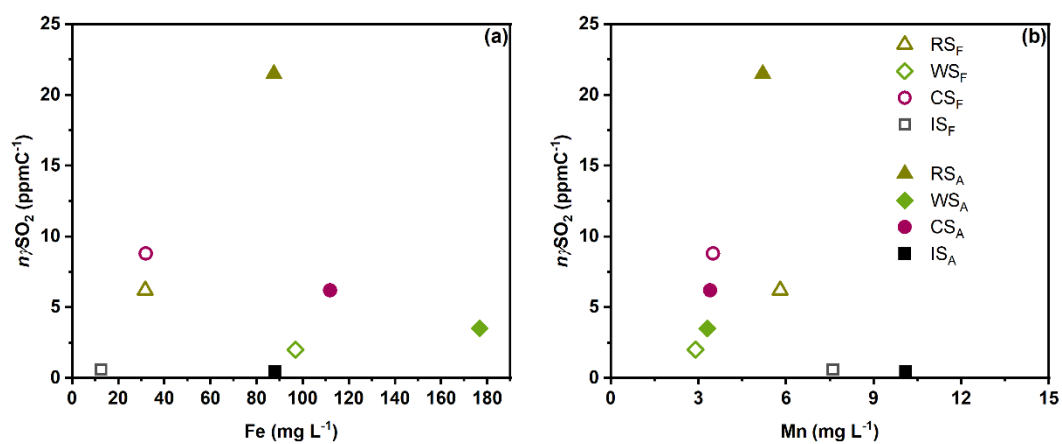

**Figure S3.** Correlation of (a) Fe and (b) Mn concentration with normalized SO<sub>2</sub> uptake coefficient ( $n\gamma_{SO_2}$ )

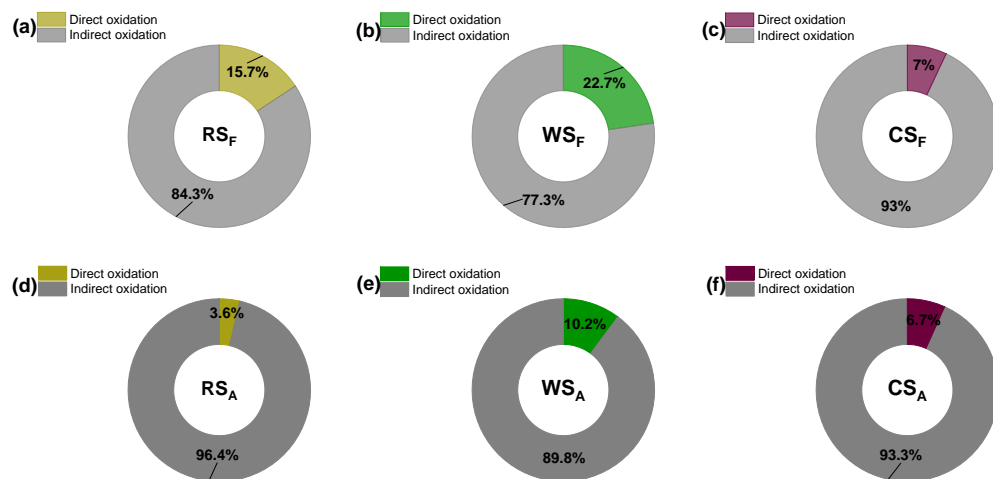

**Figure S4.** Contributions of direct and indirect PS\* oxidation to sulfate in droplet experiments



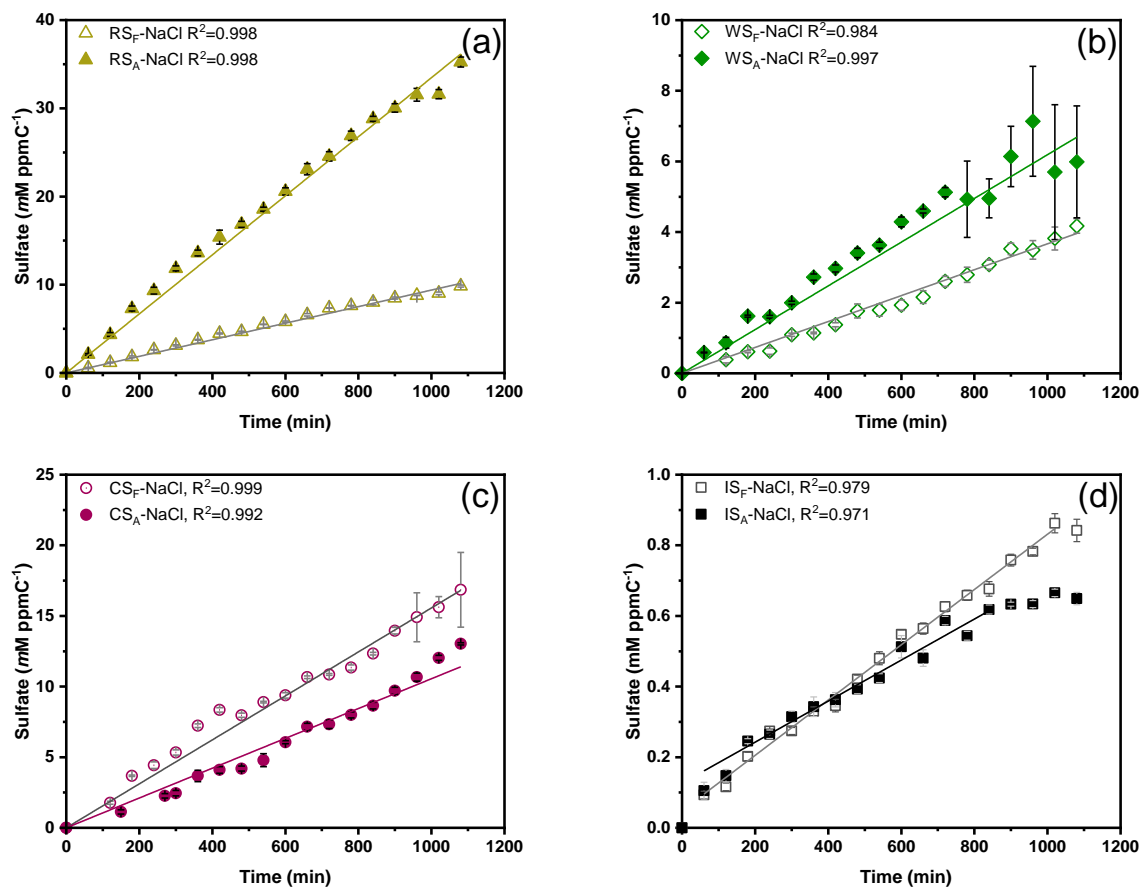

**Figure S5.** Sulfate production under different droplet compositions (fresh or aged BB-NaCl) as a function of time: (a) RS<sub>F/A</sub>-NaCl droplets; (b) WS<sub>F/A</sub>-NaCl droplets; (c) CS<sub>F/A</sub>-NaCl droplets; (d) IS<sub>F/A</sub> droplets.

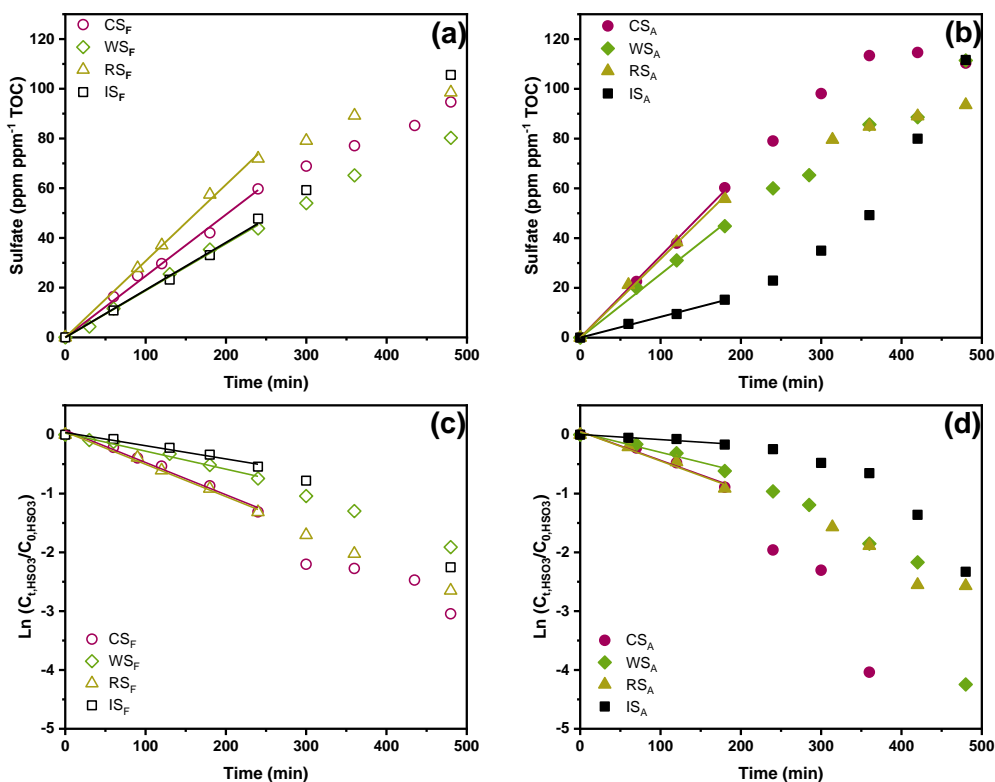

**Figure S6.** Concentration changes of (a)(b) sulfate and (c)(d) bisulfite using different BB extracts as a function of time, in which (a)(c) represent the results of fresh BB extracts, and (b)(d) represent the results of aged BB extracts.

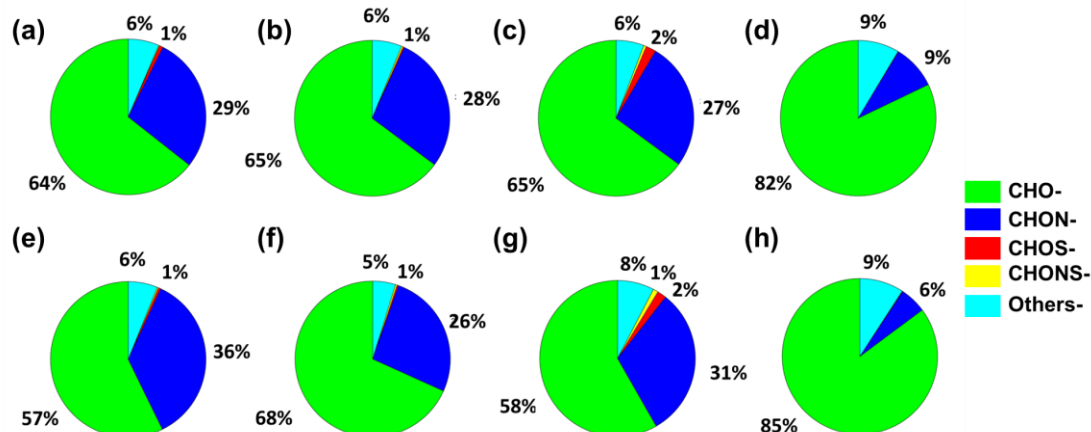

**Figure S7.** The intensity contribution (%) of each compound category to the total detected compound intensity: (a) RS<sub>F</sub>; (b) WS<sub>F</sub>; (c) CS<sub>F</sub>; (d) IS<sub>F</sub>; (e) RS<sub>A</sub>; (f) WS<sub>A</sub>; (g) CS<sub>A</sub>; (h) IS<sub>A</sub> by ESI-mode.

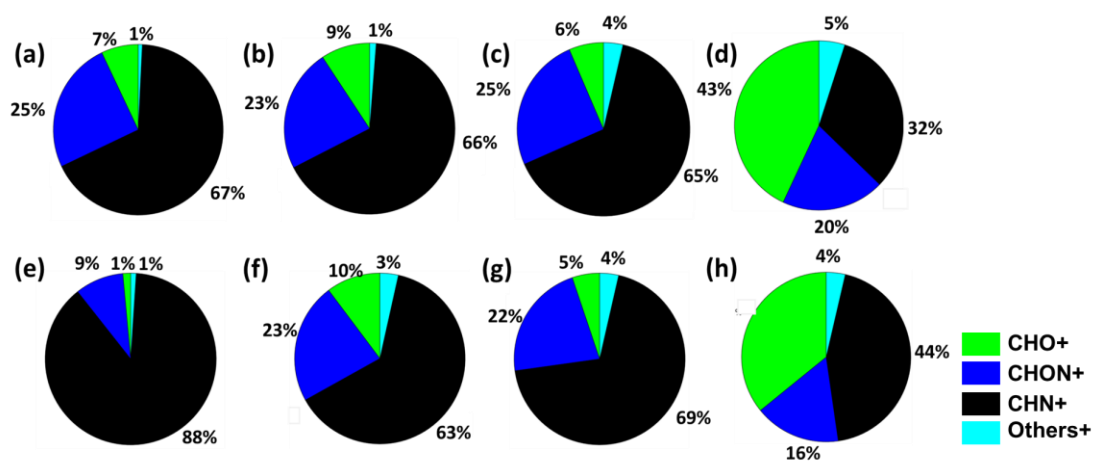

**Figure S8.** The intensity contribution (%) of each compound category to the total detected compound intensity: (a) RS<sub>F</sub>; (b) WS<sub>F</sub>; (c) CS<sub>F</sub>; (d) IS<sub>F</sub>; (e) RS<sub>A</sub>; (f) WS<sub>A</sub>; (g) CS<sub>A</sub>; (h) IS<sub>A</sub> by ESI+ mode.

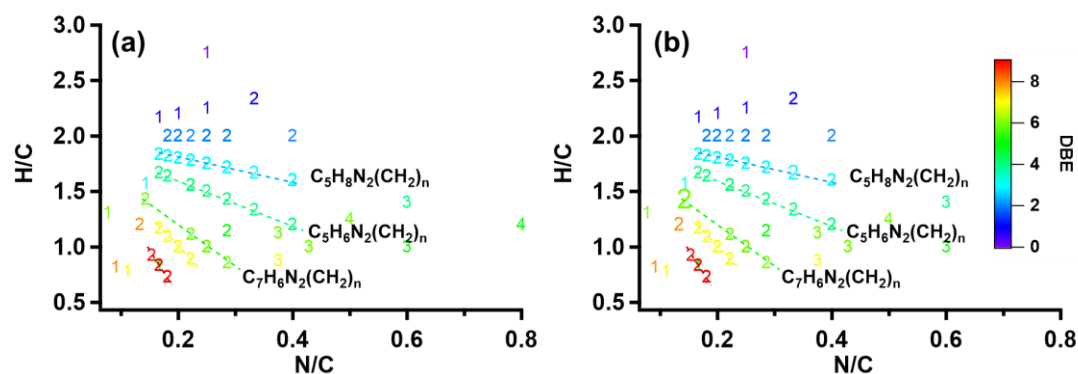

**Figure S9.** Van Krevelen plots of N-bases in (a) RS<sub>F</sub> and (b) RS<sub>A</sub>. The color bar represents the double bond equivalent, and the text marker denotes the nitrogen number in each assigned formula. Points that share the same number of nitrogen atoms and are positioned in a linear arrangement belong to identical homologous series based on CH<sub>2</sub>. These series are characterized by a core molecule combined with (CH<sub>2</sub>)<sub>n</sub> units, where n is equal to or greater than zero.

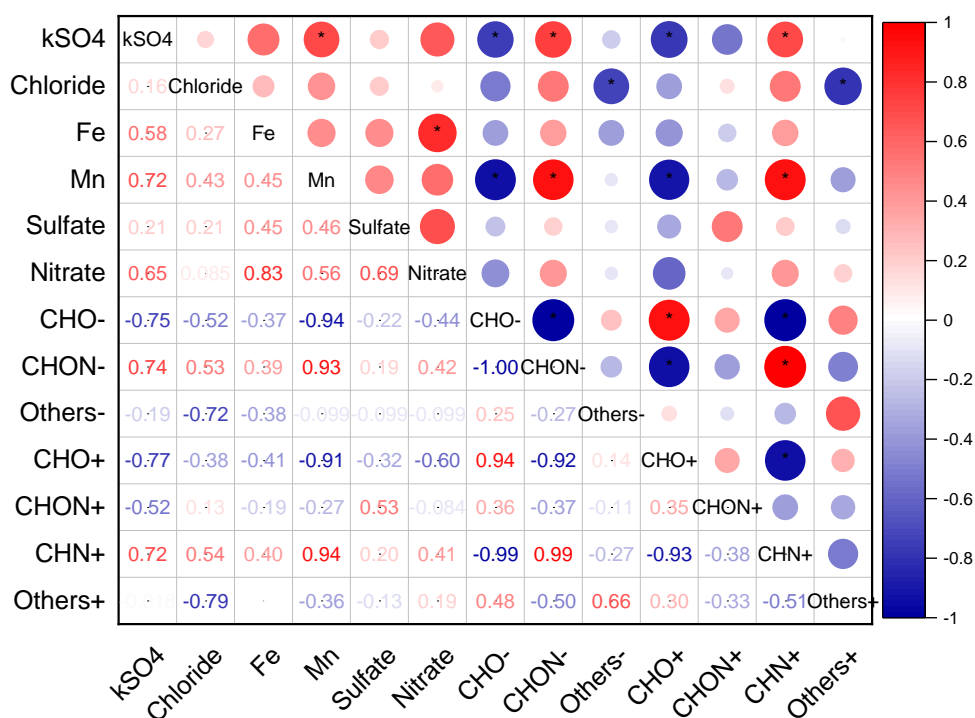

\*  $p <= 0.01$

**Figure S10.** Heatmap of Spearman correlations between sulfate formation rate (kSO4) and other factors, including chloride, Fe, Mn, sulfate, nitrate, and different chemical species detected by ESI (-) and ESI (+) mode. Note that the calculations were based on the sulfate formation rate and the original concentrations of the influencing factors in the bulk solution. The symbol \* indicates significance, i.e.,  $p \leq 0.01$ . Red color means positive correlation ( $r > 0$ ), and blue color means negative correlation ( $r < 0$ ). The darker the color, the higher the  $r$  value.

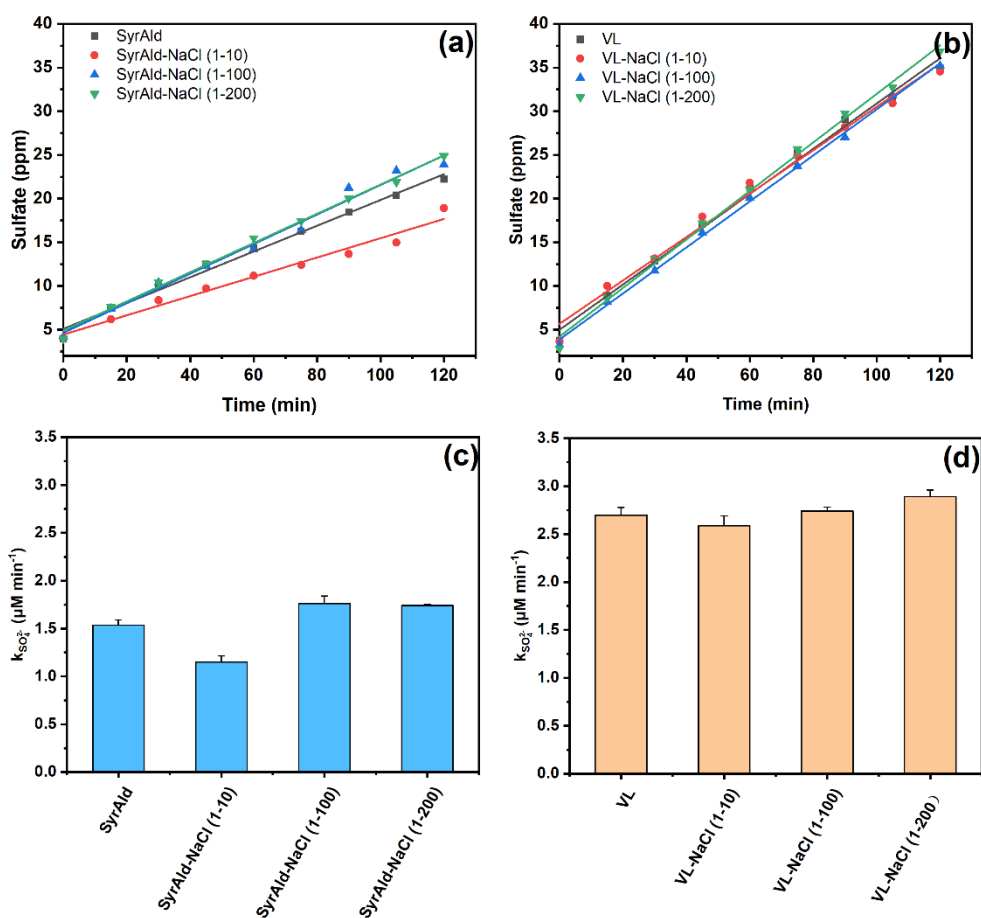

**Figure S11.** (a) (b) Sulfate formation and (c) (d) sulfate formation rates by different combinations of PS and chloride: (a)(c) SyrAld-NaCl; (b)(d) VL-NaCl. 1-10, 1-100 and 1-200 represent the mass ratios of different species. Among them, the concentrations of SyrAld and VL were 1 ppm, while the NaCl concentrations were varied, 10, 100 and 200 represent 10 ppm, 100 ppm and 200 ppm, respectively.

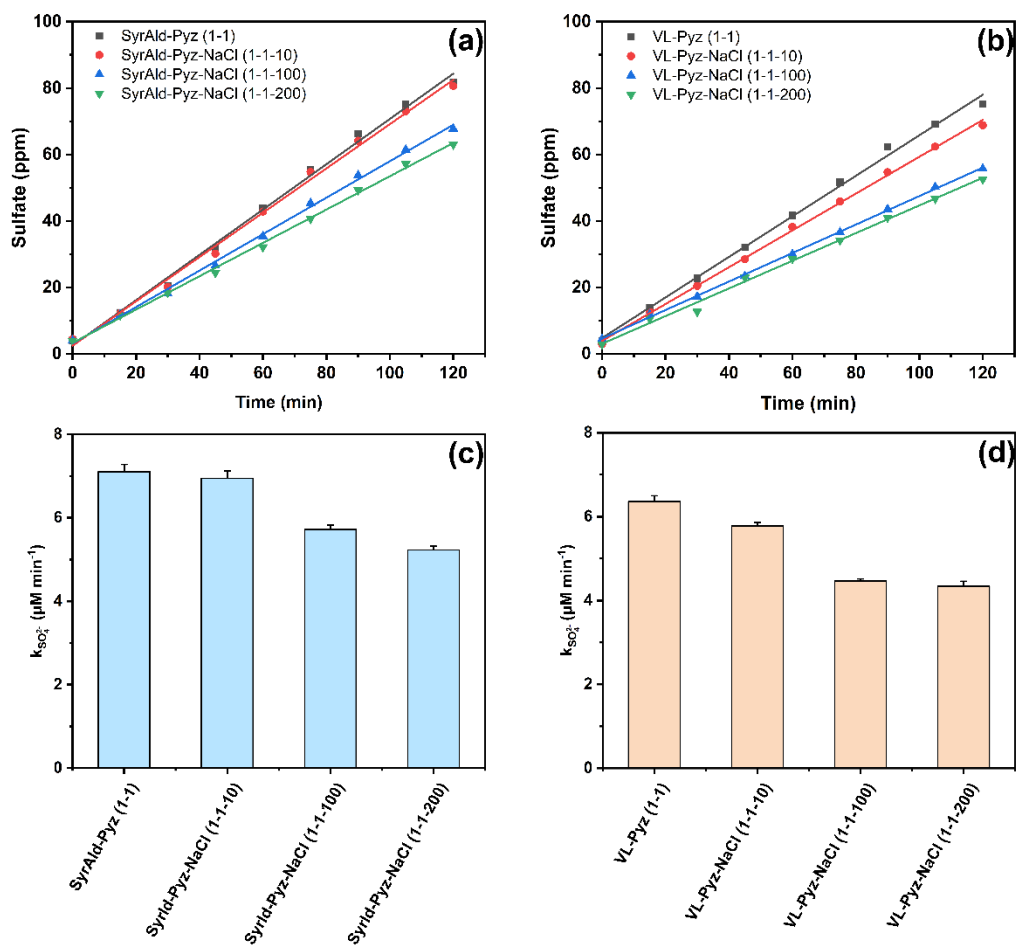

**Figure S12.** (a) (b) Sulfate formation and (c) (d) sulfate formation rates by different combinations of PS, CHN species and chloride: (a)(c) SyrAld-Pyz-(NaCl); (b)(d) VL-Pyz-(NaCl). 1-1-10, 1-1-100 and 1-1-200 represent the mass ratios of different species. Among them, the concentrations of SyrAld, VL and Pyz were 1 ppm, while the NaCl concentrations were varied, 10, 100 and 200 represent 10 ppm, 100 ppm and 200 ppm, respectively.

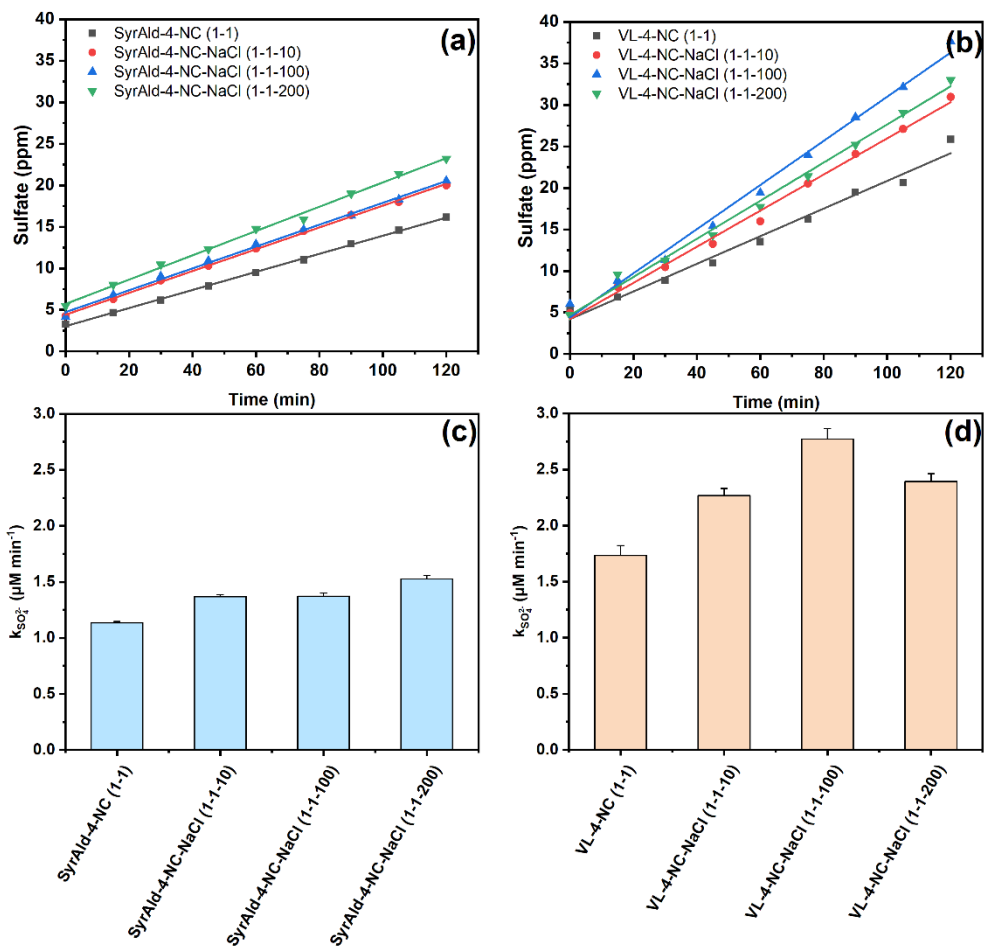

**Figure S13.** (a) (b) Sulfate formation and (c) (d) sulfate formation rates by different combinations of PS, CHON species and chloride: (a)(c) SyrAld-4-NC-(NaCl); (b)(d) VL-4-NC-(NaCl). 1-1-10, 1-1-100 and 1-1-200 represent the mass ratios of different species. Among them, the concentrations of SyrAld, VL and 4-NC were 1 ppm, while the NaCl concentrations were varied, 10, 100 and 200 represent 10 ppm, 100 ppm and 200 ppm, respectively.

## REFERENCES

- Koch, B. P. and Dittmar, T.: From mass to structure: An aromaticity index for high-resolution mass data of natural organic matter, *Rapid communications in mass spectrometry*, 20, 926-932, 2006.
- Song, K., Gong, Y., Guo, S., Lv, D., Wang, H., Wan, Z., Yu, Y., Tang, R., Li, T., and Tan, R.: Investigation of partition coefficients and fingerprints of atmospheric gas-and particle-phase intermediate volatility and semi-volatile organic compounds using pixel-based approaches, *Journal of Chromatography A*, 1665, 462808, 2022a.
- Song, K., Guo, S., Gong, Y., Lv, D., Zhang, Y., Wan, Z., Li, T., Zhu, W., Wang, H., and Yu, Y.: Impact of cooking style and oil on semi-volatile and intermediate volatility organic compound emissions from Chinese domestic cooking, *Atmospheric Chemistry and Physics*, 22, 9827-9841, 2022b.
- Zhang, Y., Wang, K., Tong, H., Huang, R.-J., and Hoffmann, T.: The maximum carbonyl ratio (MCR) as a new index for the structural classification of secondary organic aerosol components, *Rapid Communications in Mass Spectrometry*, 35, e9113, <https://doi.org/10.1002/rcm.9113>, 2021.
- Zherebker, A., Rukhovich, G. D., Sarycheva, A., Lechtenfeld, O. J., and Nikolaev, E. N.: Aromaticity Index with Improved Estimation of Carboxyl Group Contribution for Biogeochemical Studies, *Environmental Science & Technology*, 56, 2729-2737, 10.1021/acs.est.1c04575, 2022.
